# Supplementary material for: Design, synthesis, molecular docking and biological evaluation of 1,2,4-triazole derivatives possessing a hydrazone moiety as anti-breast cancer agents
Source: Royal Society of Chemistry journal article supplement (doi:10.1039/d3nj01320k), 2023-01-01
Supplement: d3nj01320k1.pdf [file d3nj01320k1.pdf]

## Supporting Information

### Design, synthesis, molecular docking and biological evaluation of 1,2,4 triazole derivatives possessing a hydrazone moiety as anti-breast cancer agents

Michael Tapera <sup>a</sup>, Hüseyin Kekeçmuhammed <sup>a</sup>, Cansu Umran Tunc <sup>b,c</sup>, Aybuke Ulku Kutlu <sup>b,c</sup>, İsmail Çelik <sup>d</sup>, Yunus Zorlu <sup>e</sup>, Omer Aydın <sup>b,c,f,g</sup>, Emin Sarıpınar <sup>a,\*</sup>

<sup>a</sup> Department of Chemistry, Faculty of Science, Erciyes University, 38039, Kayseri, Turkey

<sup>b</sup> Department of Biomedical Engineering, Erciyes University, 38039, Kayseri, Turkey

<sup>c</sup> NanoThera Lab, ERFARMA-Drug Application and Research Center, Erciyes University, 38039, Kayseri, Turkey

<sup>d</sup> Department of Pharmaceutical Chemistry, Faculty of Pharmacy, 38039 Erciyes University, Kayseri, Turkey

<sup>e</sup> Department of Chemistry, Gebze Technical University, 41400, Kocaeli, Turkey

<sup>f</sup> ERNAM-Nanotechnology Research and Application Center, Erciyes University, 38039, Kayseri, Turkey

<sup>g</sup> ERKAM-Clinical Engineering Research and Implementation Center, Erciyes University, 38030, Kayseri, Turkey

---

\*Corresponding Author:

Prof. Dr Emin SARIPINAR

Address: Erciyes University

Department of Chemistry

Faculty of Science

38039

Kayseri, TURKEY

e-mail: [emin@erciyes.edu.tr](mailto:emin@erciyes.edu.tr)

Phone: +90 352 207 6666

| Table of Contents                                                                                                       |    |
|-------------------------------------------------------------------------------------------------------------------------|----|
| Crystal data and structure refinement details for <b>BIH2</b>                                                           | S1 |
| Molecular docking results of most active compound BIH4 and cocrystal ligand of apoptosis regulator Bcl-2 (PDB ID: 6O0K) | S2 |
| Copies of $^1\text{H}$ and $^{13}\text{C}\{^1\text{H}\}$ NMR spectra of compounds                                       | S3 |

Crystallographic data with CCDC reference number 2155032 **BIH2** has been deposited within the Cambridge Crystallographic Data Center via [www.ccdc.cam.ac.uk/deposit](http://www.ccdc.cam.ac.uk/deposit). Crystallographic data and refinement details of the data collection are presented in supporting information.

**Table 1.** Crystal data and structure refinement details for **BIH2**.

| Compound                                    | <b>BIH2</b>                                                   |
|---------------------------------------------|---------------------------------------------------------------|
| CCDC                                        | 2155032                                                       |
| Empirical formula                           | C <sub>24</sub> H <sub>21</sub> N <sub>7</sub> O <sub>2</sub> |
| Formula weight/g. mol <sup>-1</sup>         | 439.48                                                        |
| Temperature/K                               | 298                                                           |
| Radiation, Wavelength (Å)                   | MoKα (λ = 0.71073)                                            |
| Crystal system                              | Monoclinic                                                    |
| Space group                                 | C2/c                                                          |
| a/Å                                         | 26.325(4)                                                     |
| b/Å                                         | 8.6403(14)                                                    |
| c/Å                                         | 22.014(4)                                                     |
| α/°                                         | 90                                                            |
| β/°                                         | 117.940(2)                                                    |
| γ/°                                         | 90                                                            |
| Volume/Å <sup>3</sup>                       | 4423.7(12)                                                    |
| Z                                           | 8                                                             |
| ρ <sub>calcd</sub> (g. cm <sup>-3</sup> )   | 1.320                                                         |
| μ (mm <sup>-1</sup> )                       | 0.089                                                         |
| F(000)                                      | 1840                                                          |
| 2θ range for data collection (°)            | 3.502 to 49.992                                               |
| h/k/l                                       | -31 ≤ h ≤ 31, -10 ≤ k ≤ 10, -26 ≤ l ≤ 26                      |
| Reflections collected                       | 13333                                                         |
| Independent reflections                     | 3877 [R <sub>int</sub> = 0.0735, R <sub>sigma</sub> = 0.0710] |
| Data/restraints/parameters                  | 3877/0/300                                                    |
| Goodness-of-fit on F <sup>2</sup> (S)       | 1.060                                                         |
| Final R indices [I > 2σ(I)]                 | R <sub>1</sub> = 0.0528,<br>wR <sub>2</sub> = 0.1299          |
| R indices (all data)                        | R <sub>1</sub> = 0.0939,<br>wR <sub>2</sub> = 0.1460          |
| Largest diff. peak/hole / e Å <sup>-3</sup> | 0.22/-0.16                                                    |

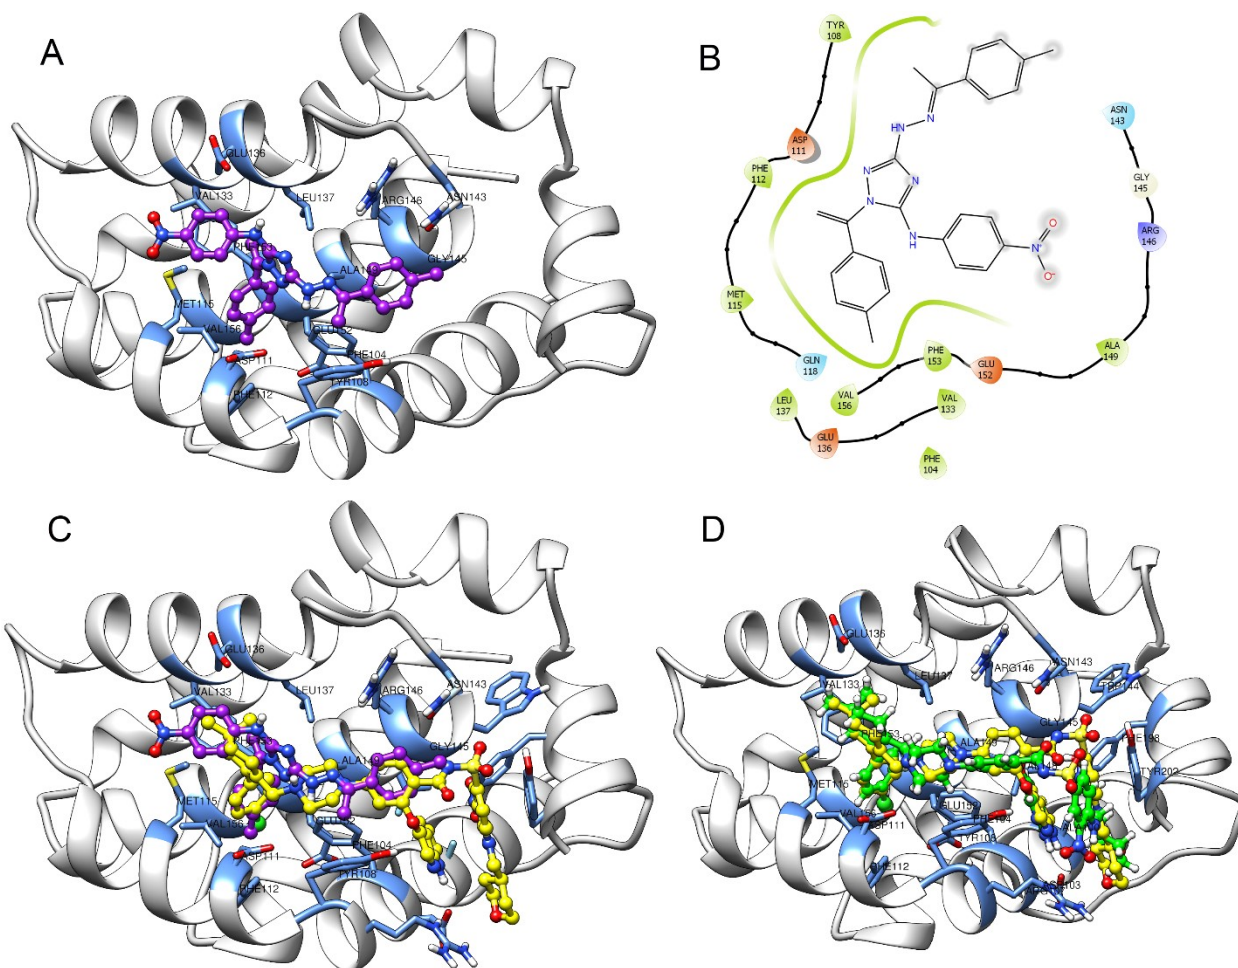

**Fig. S2.** Molecular docking results of most active compound BIH4 and cocystal ligand of apoptosis regulator Bcl-2 (PDB ID: 6O0K). (A) Binding poses of BIH4 at Bcl-2 active site, (B) Schematic protein-ligand 2D interaction diagram of BIH4, (C) Superimposition of docked compound BIH4 (purple) and cocystal ligand of Bcl-2 (yellow), and (D) Natural binding pose (yellow) of and re-docking pose (green) of cocystal ligand (RMSD: 1.57 Å).

# Copies of $^1\text{H}$ and $^{13}\text{C}\{^1\text{H}\}$ NMR spectra of compounds

## BI1

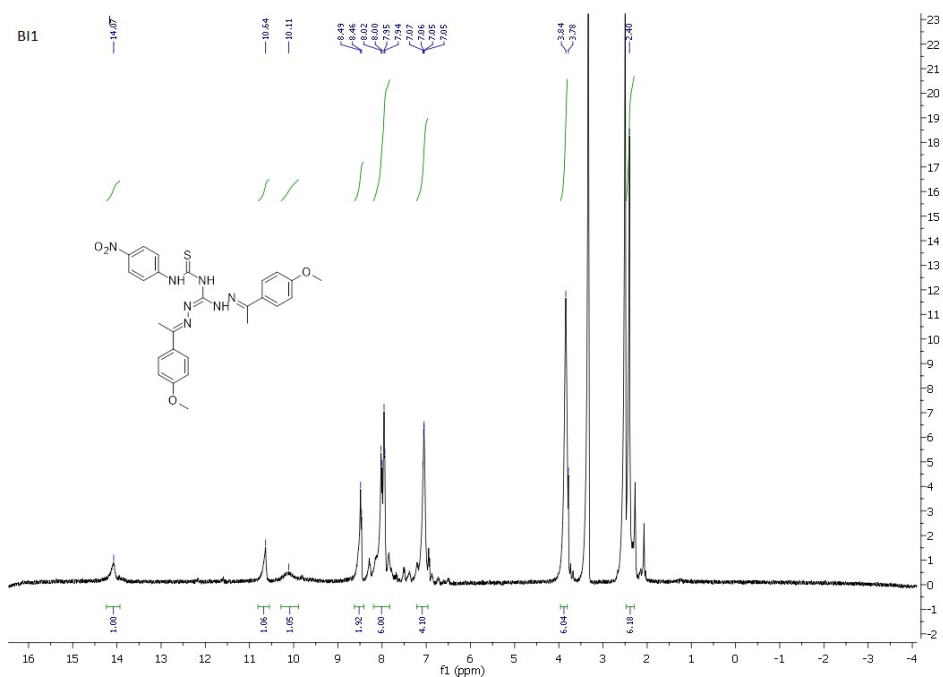

Figure 1.  $^1\text{H}$ -NMR spectrum of compound BI1

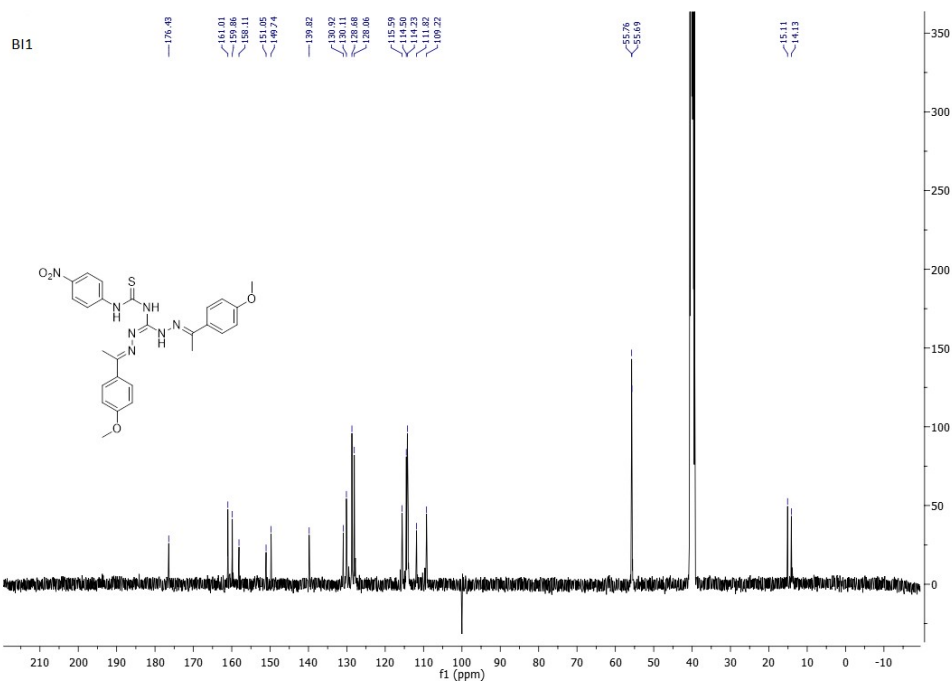

**Figure 2.**  $^{13}\text{C}$ -NMR spectrum of compound **BI1**

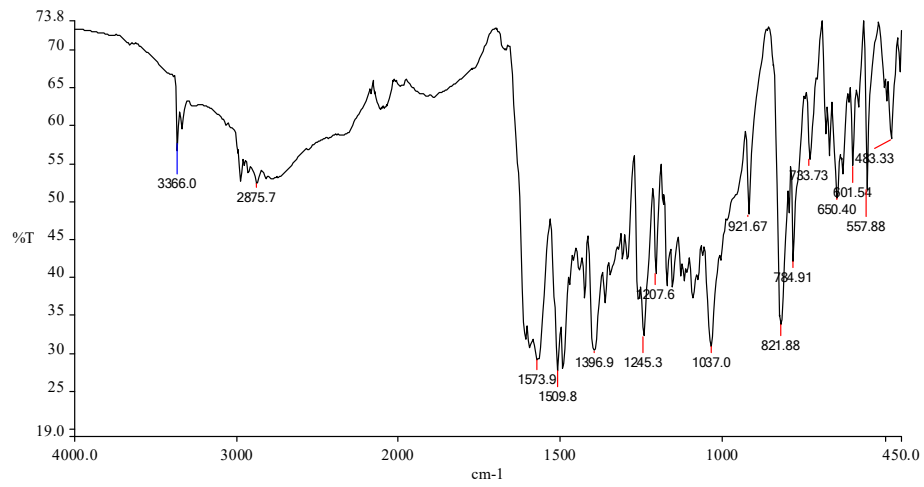

**Figure 3.** IR spectrum of compound **BI1**

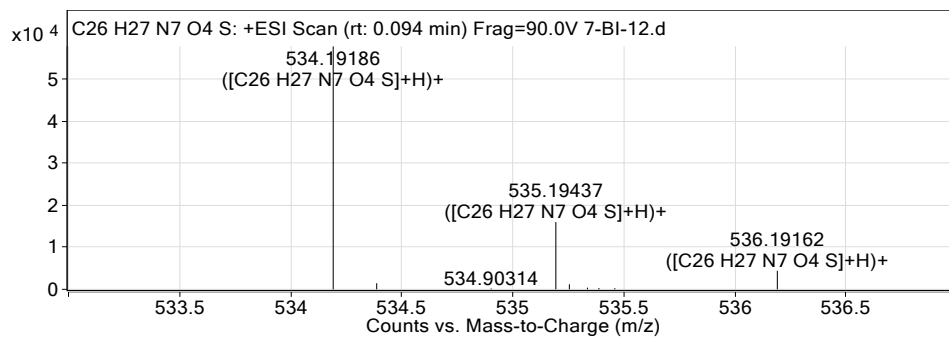

**Figure 4.** Mass spectrum of compound **BI2**

**BI2**

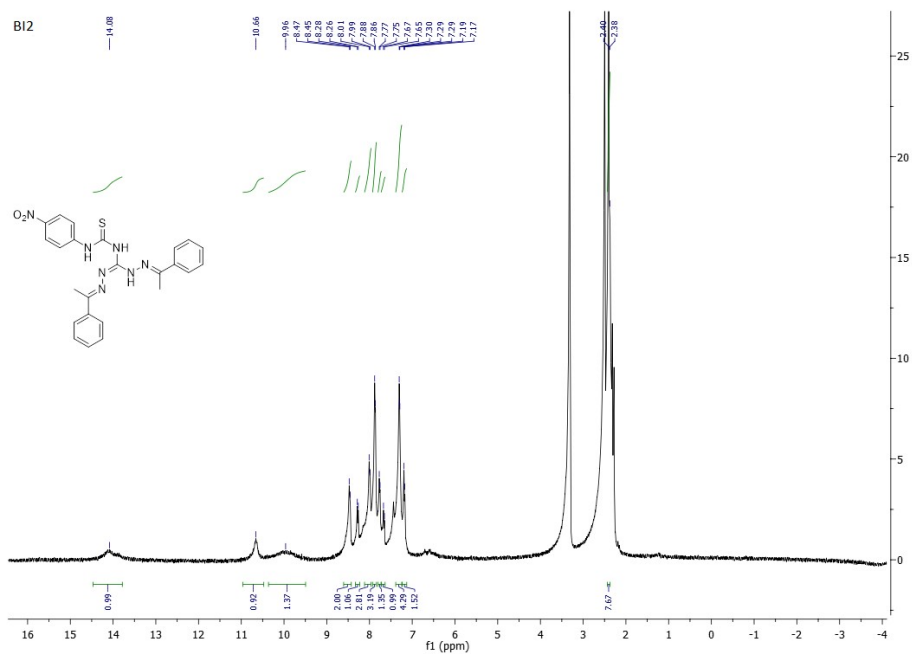

**Figure 5.** <sup>1</sup>H-NMR spectrum of compound **BI2**

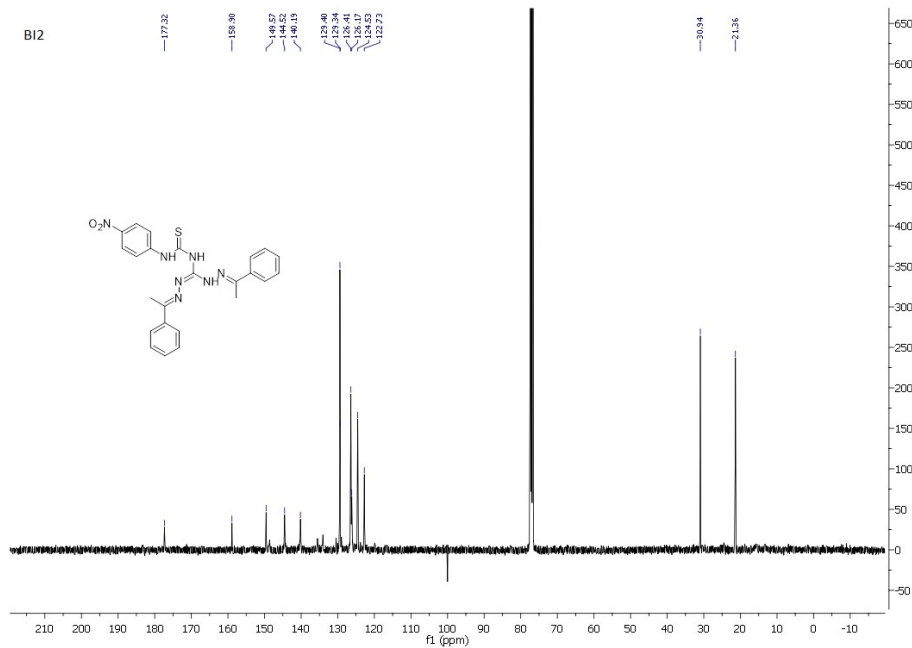

**Figure 6.** <sup>13</sup>C-NMR spectrum of compound **BI2**

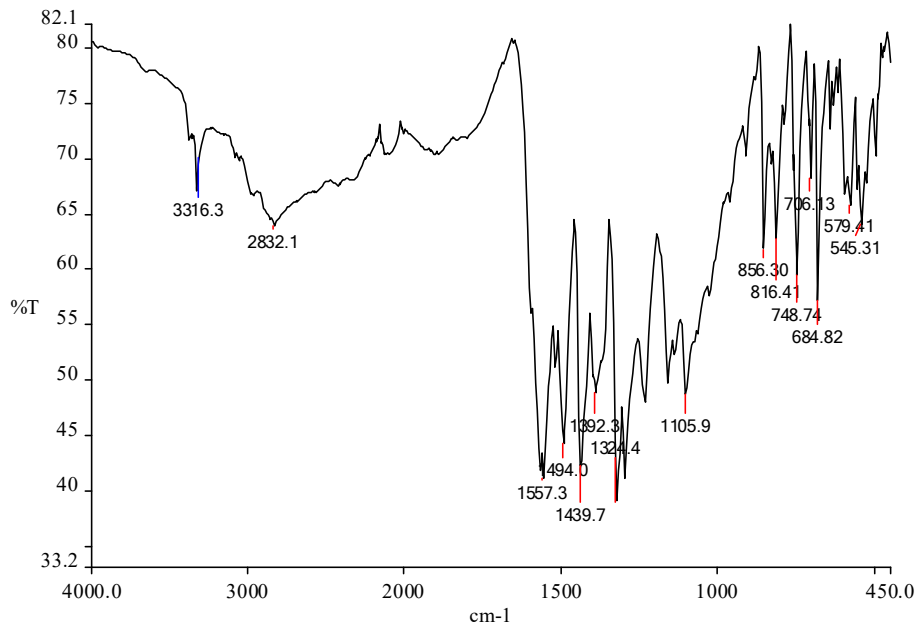

**Figure 7.** IR spectrum of compound BI2

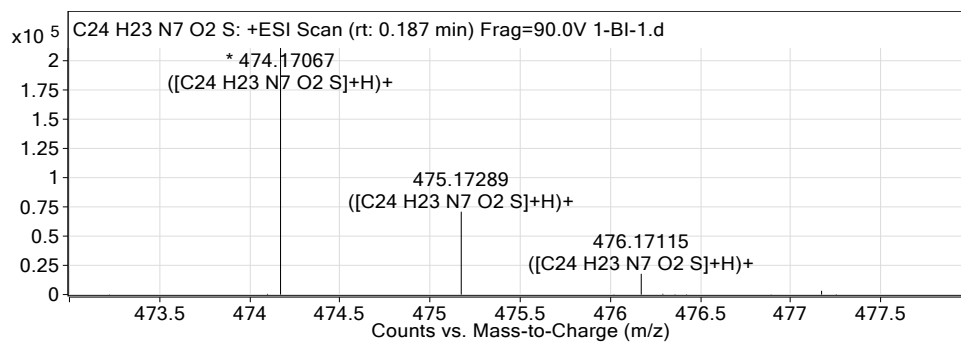

**Figure 8.** Mass spectrum of compound BI2





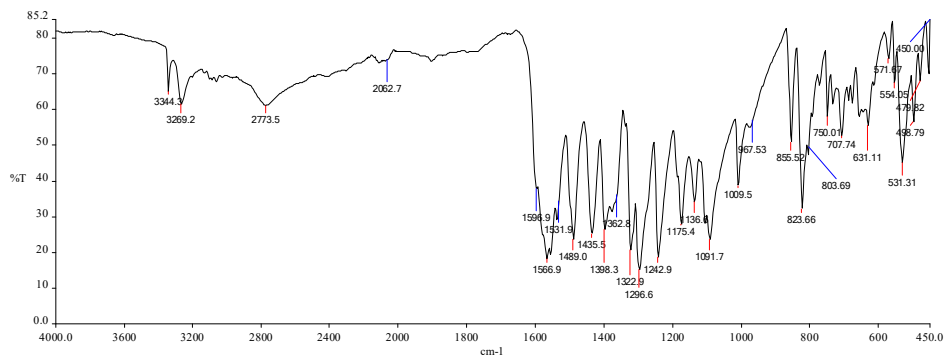

**Figure 11.** IR spectrum of compound BI3

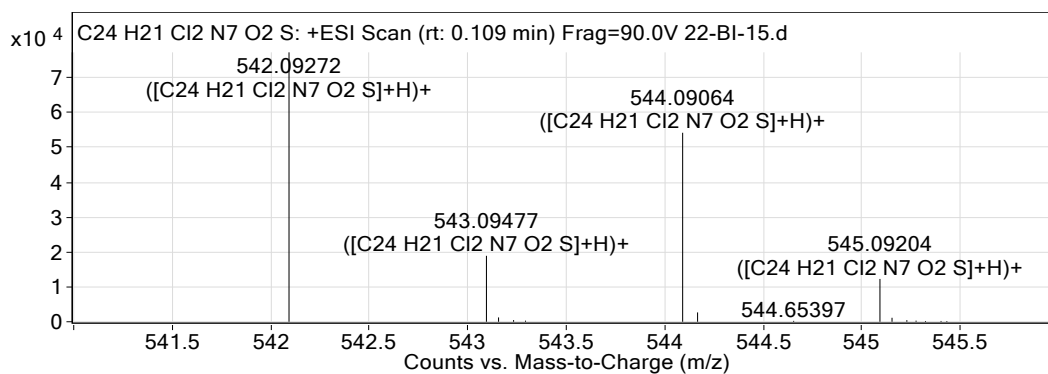

**Figure 12.** Mass spectrum of compound BI3

# BI4

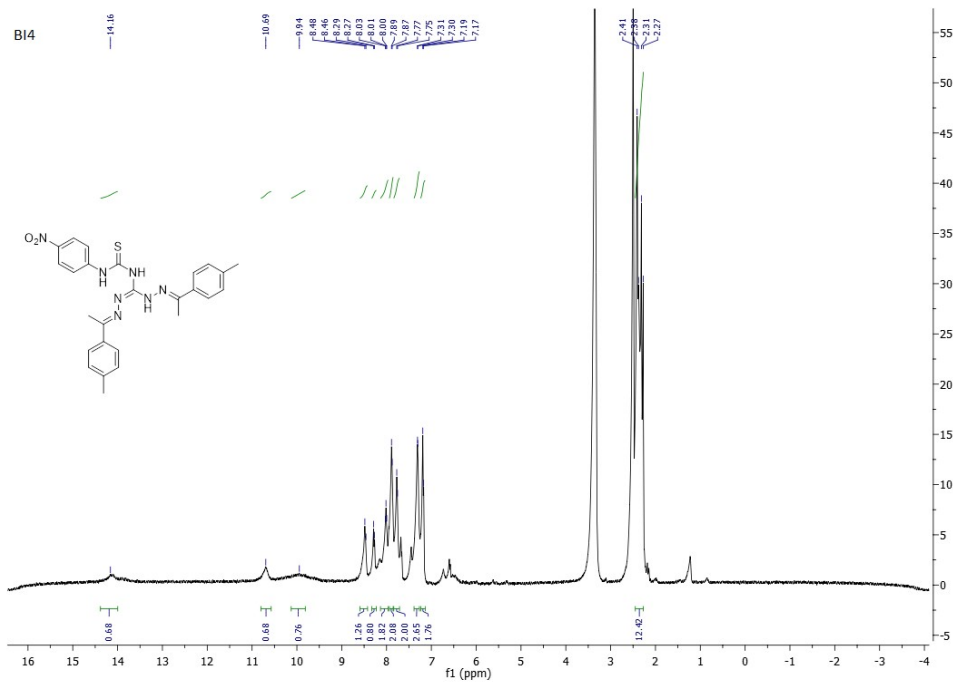

Figure 13. <sup>1</sup>H-NMR spectrum of compound BI4

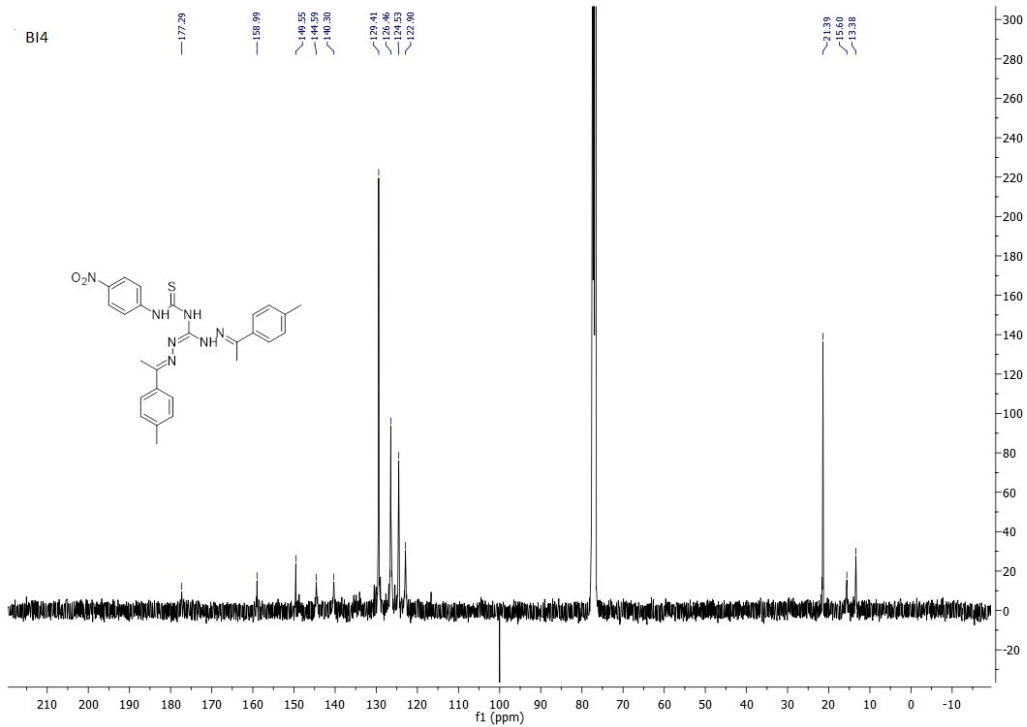

Figure 14. <sup>13</sup>C-NMR spectrum of compound BI4

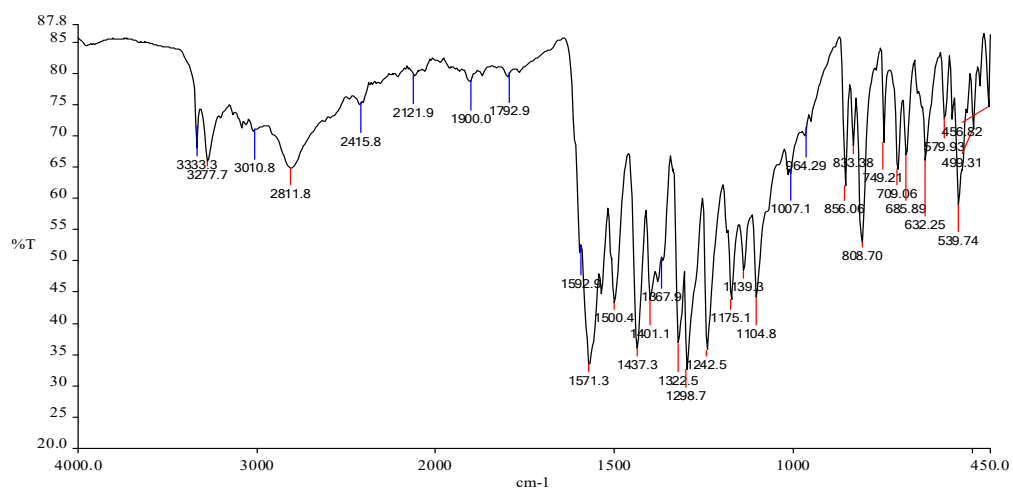

**Figure 15.** IR spectrum of compound **B14**

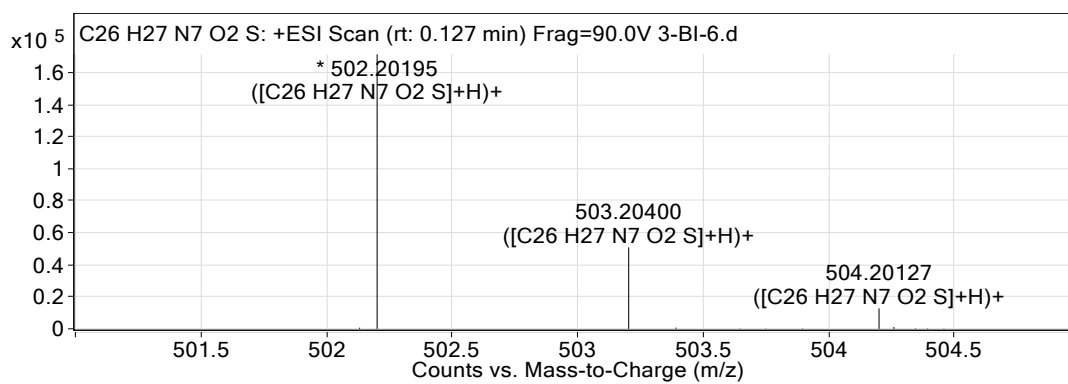

**Figure 16.** Mass spectrum of compound **B14**

# BI5

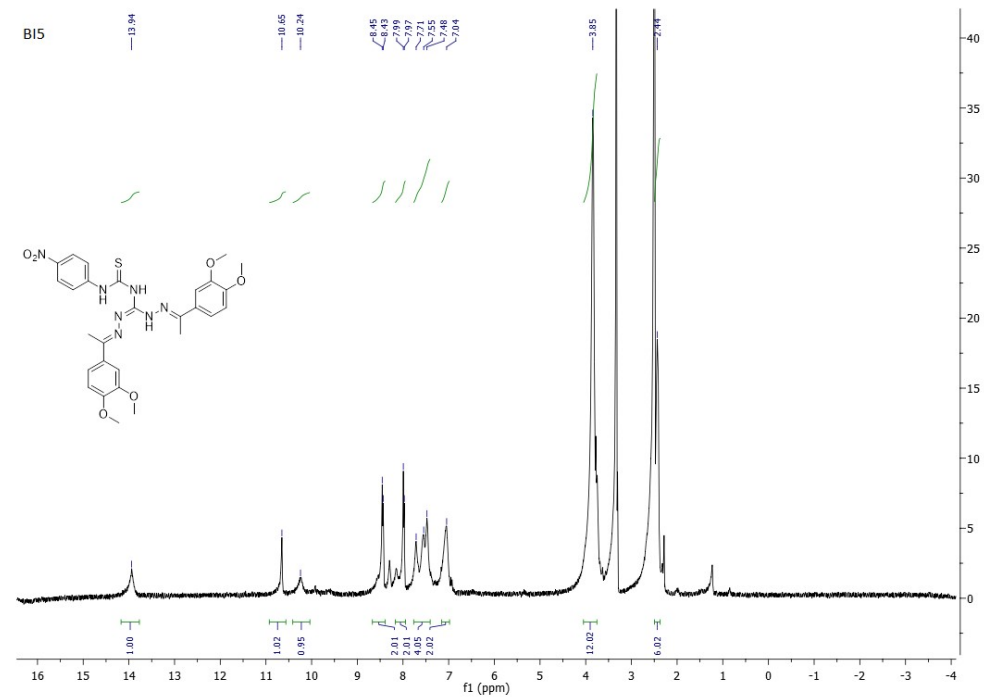

Figure 17. <sup>1</sup>H-NMR spectrum of compound BI5

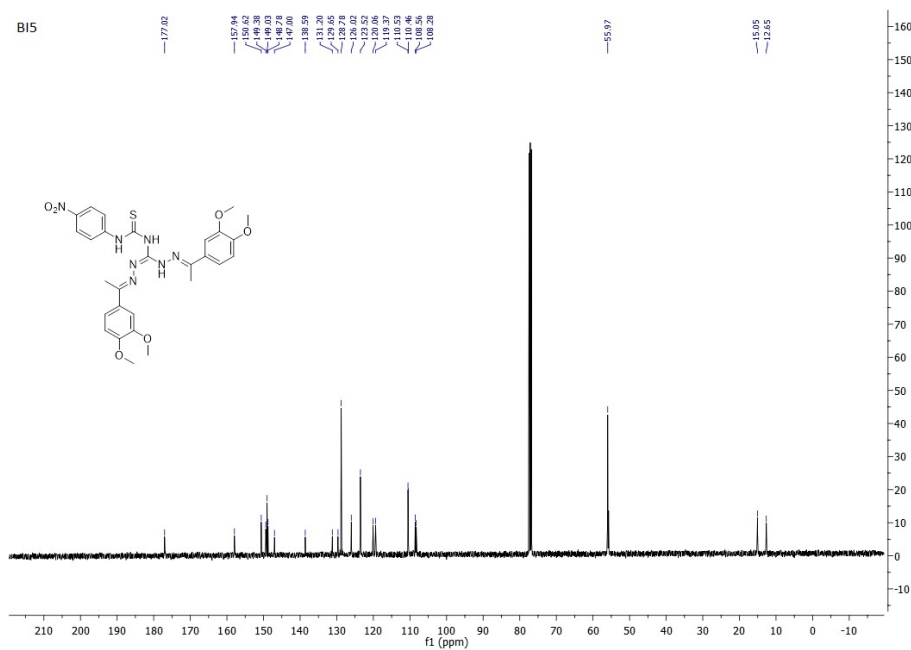

Figure 18. <sup>13</sup>C-NMR spectrum of compound BI5

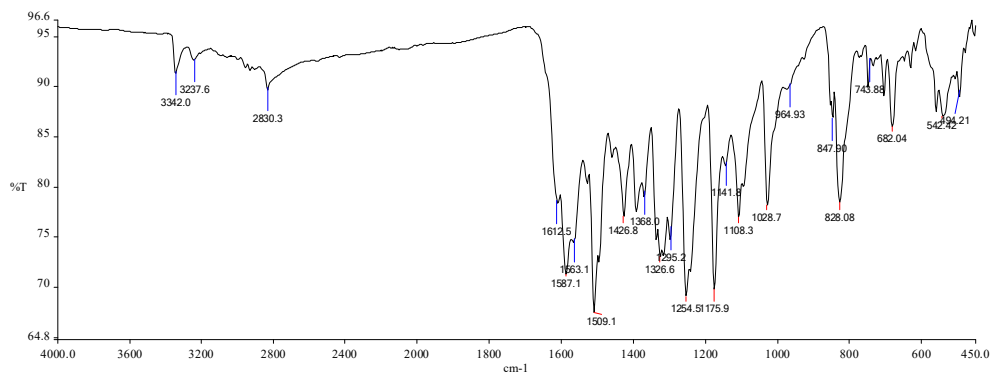

**Figure 19.** IR spectrum of compound **B15**

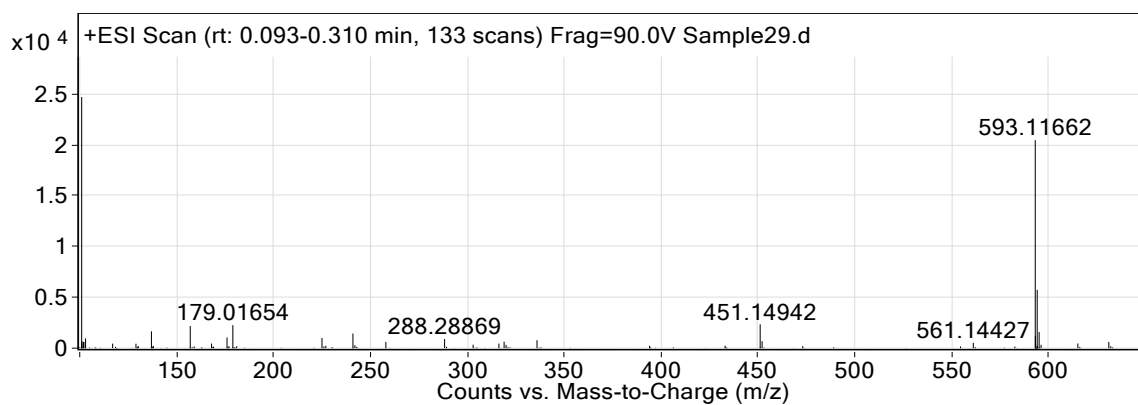

**Figure 20.** Mass spectrum of compound **B15**

# BI6

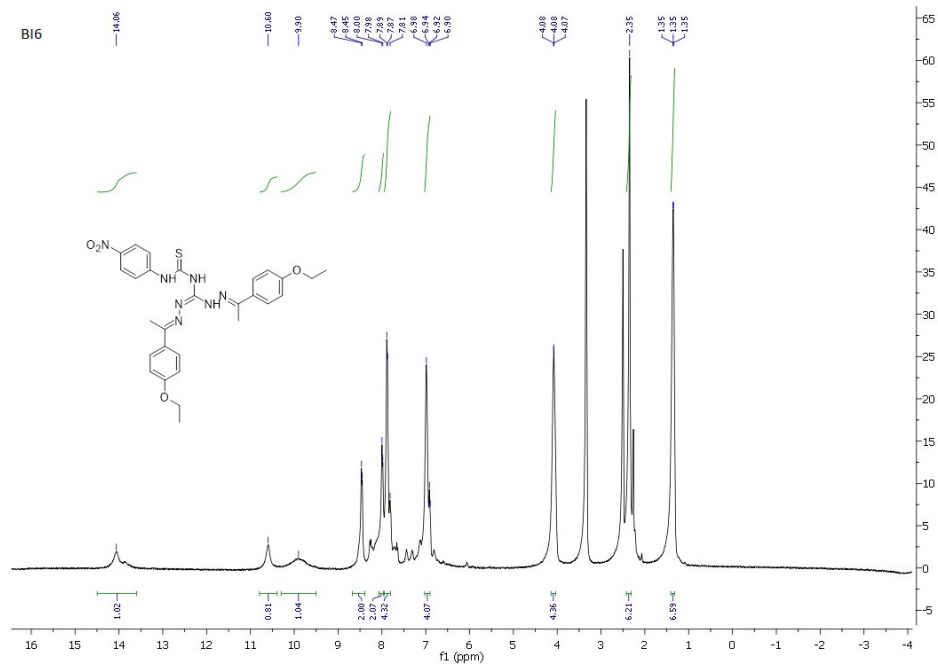

Figure 21. <sup>1</sup>H-NMR spectrum of compound BI6

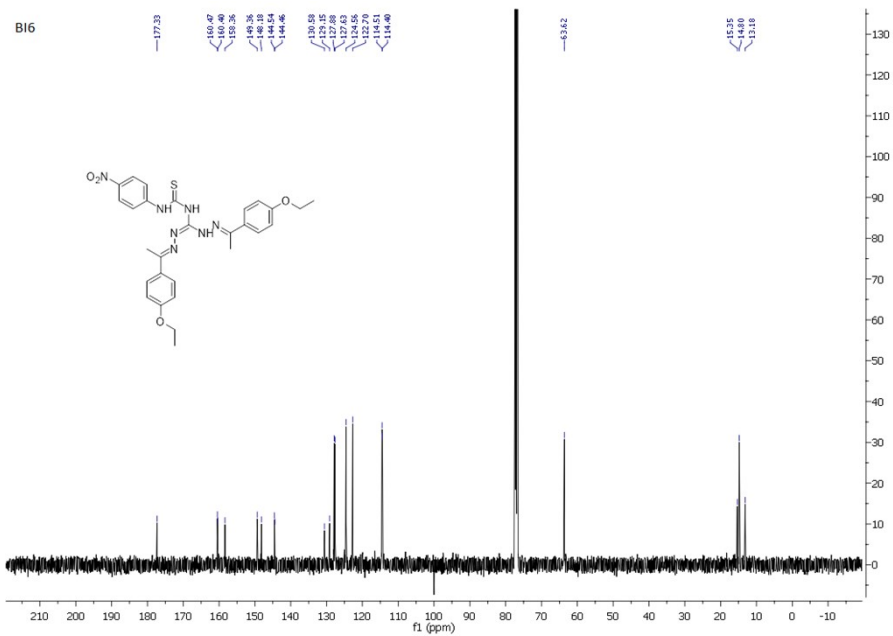

Figure 22. <sup>13</sup>C-NMR spectrum of compound BI6

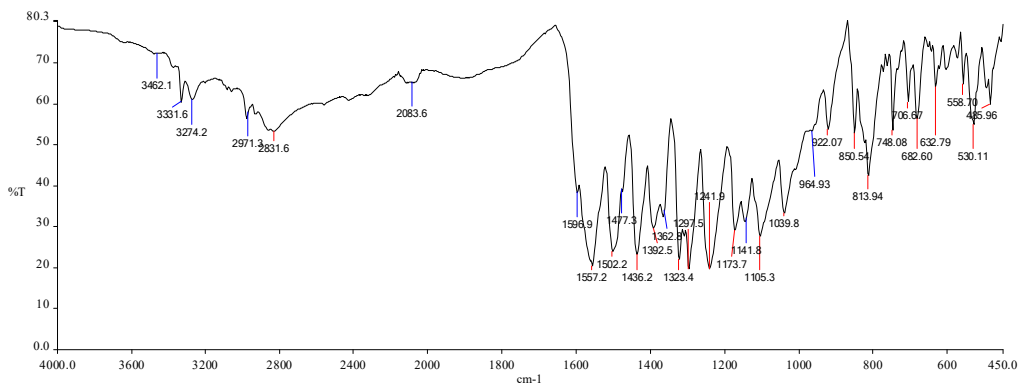

Figure 23. IR spectrum of compound BI6

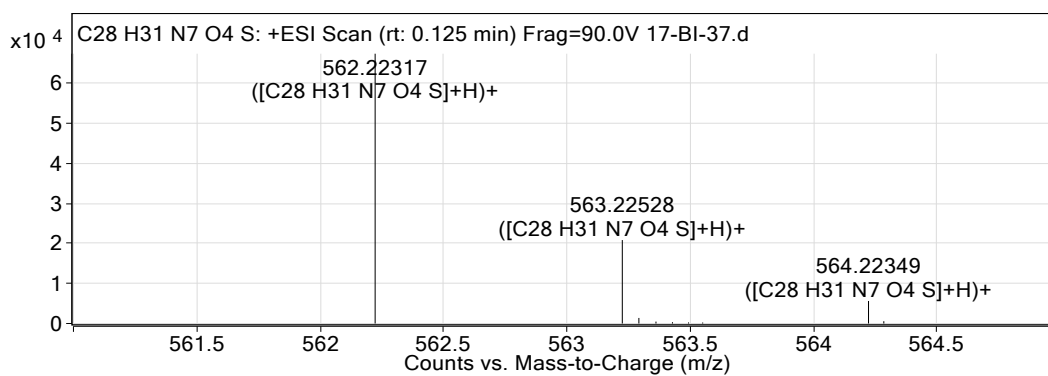

Figure 24. Mass spectrum of compound BI6



# BIH1

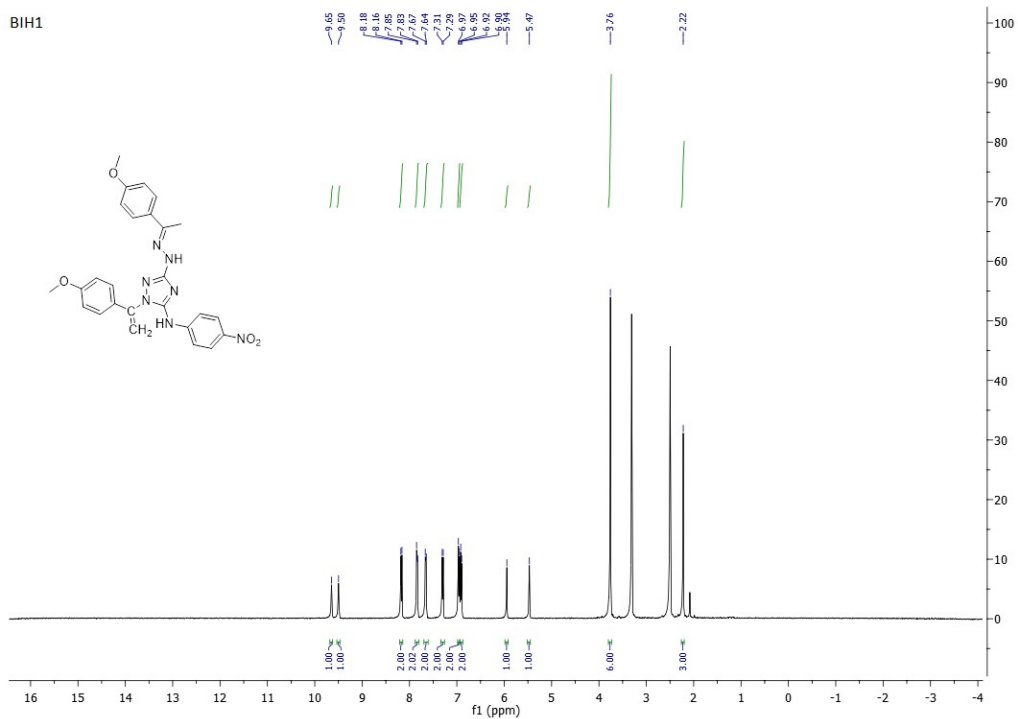

Figure 25.  $^1\text{H}$ -NMR spectrum of compound BIH1

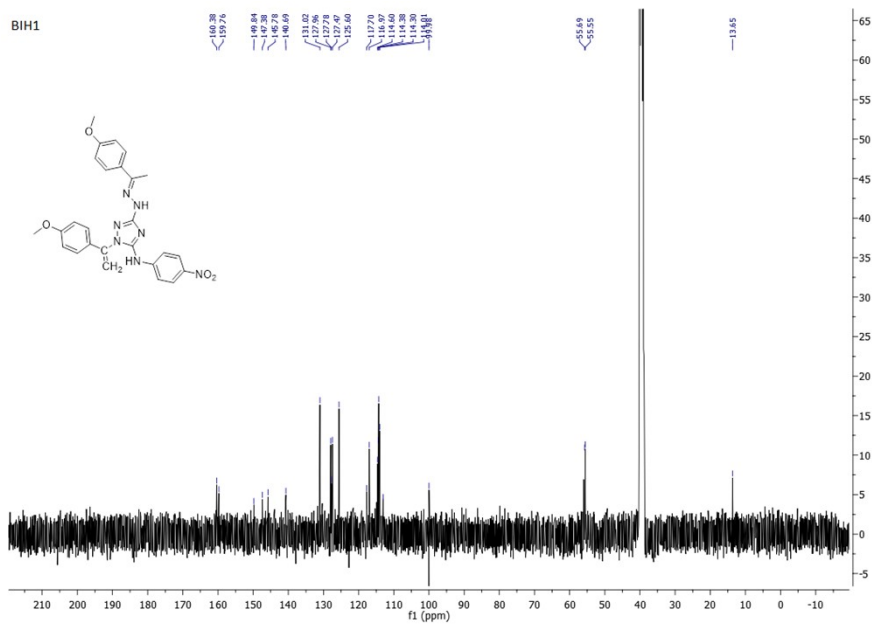

Figure 26.  $^{13}\text{C}$ -NMR spectrum of compound BIH1

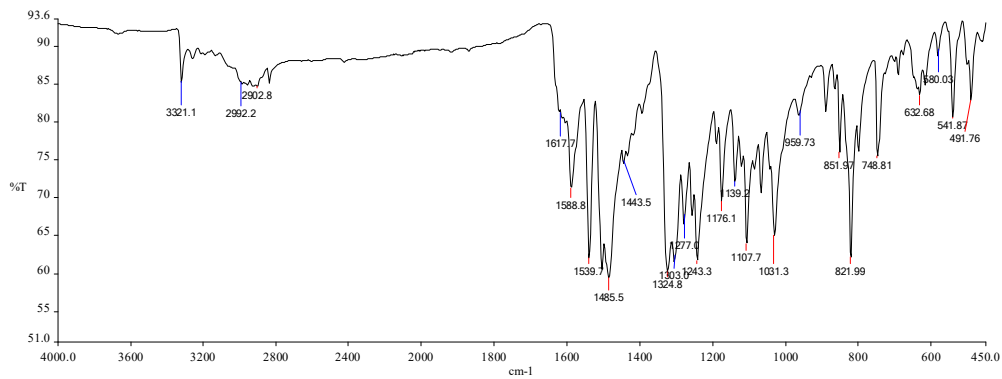

**Figure 27.** IR spectrum of compound **BIH1**

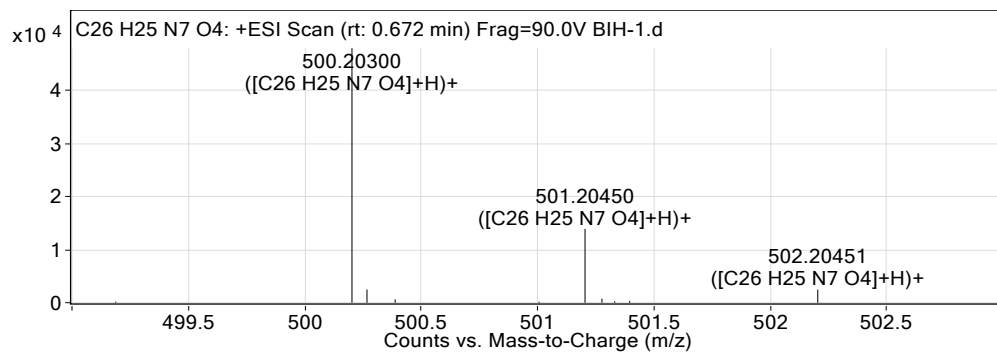

**Figure 28.** Mass spectrum of compound **BIH1**

**BIH2**



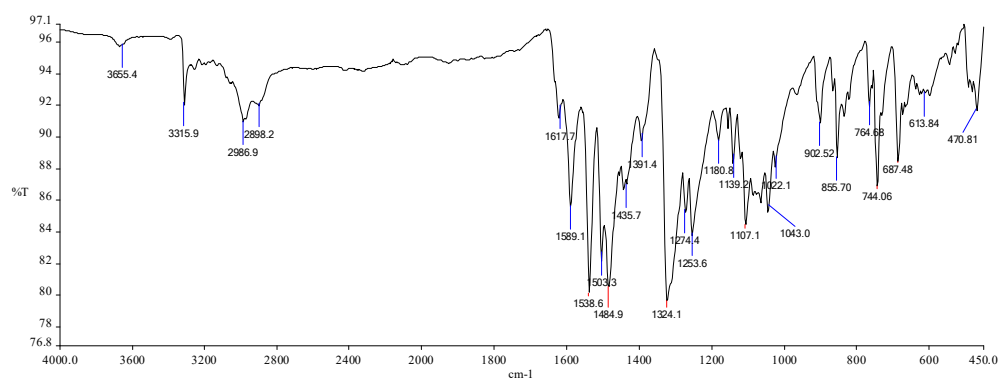

**Figure 31.** IR spectrum of compound **BIH2**

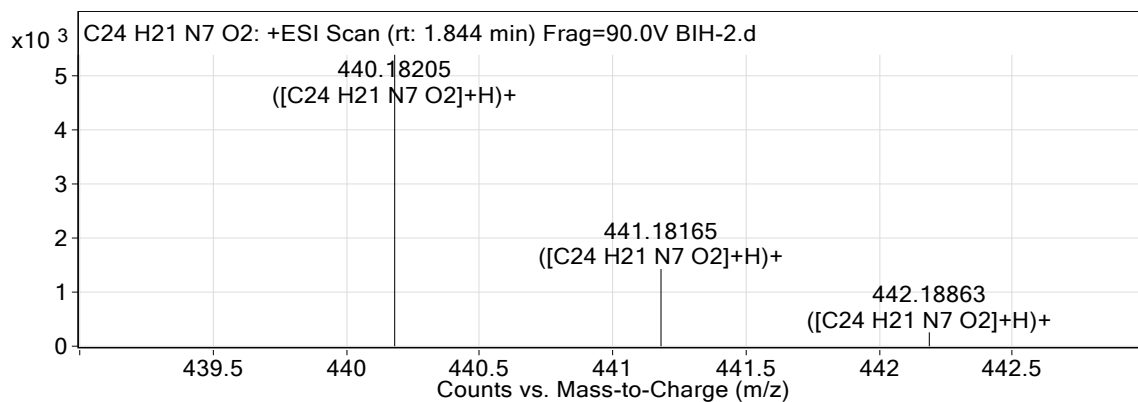

**Figure 32.** Mass spectrum of compound **BIH2**

# BIH3

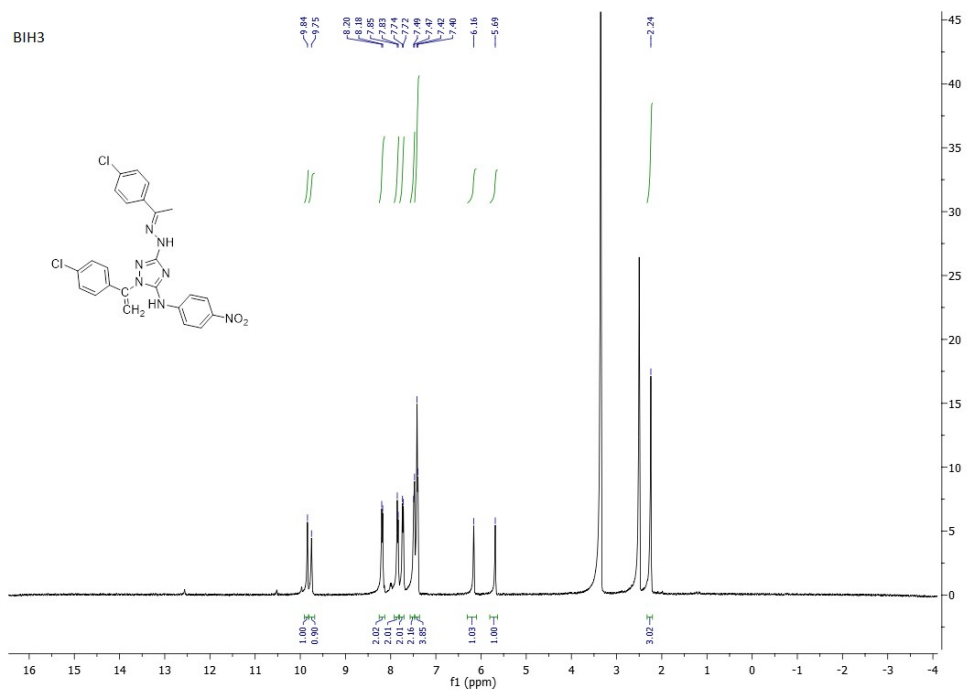

Figure 33. <sup>1</sup>H-NMR spectrum of compound BIH3

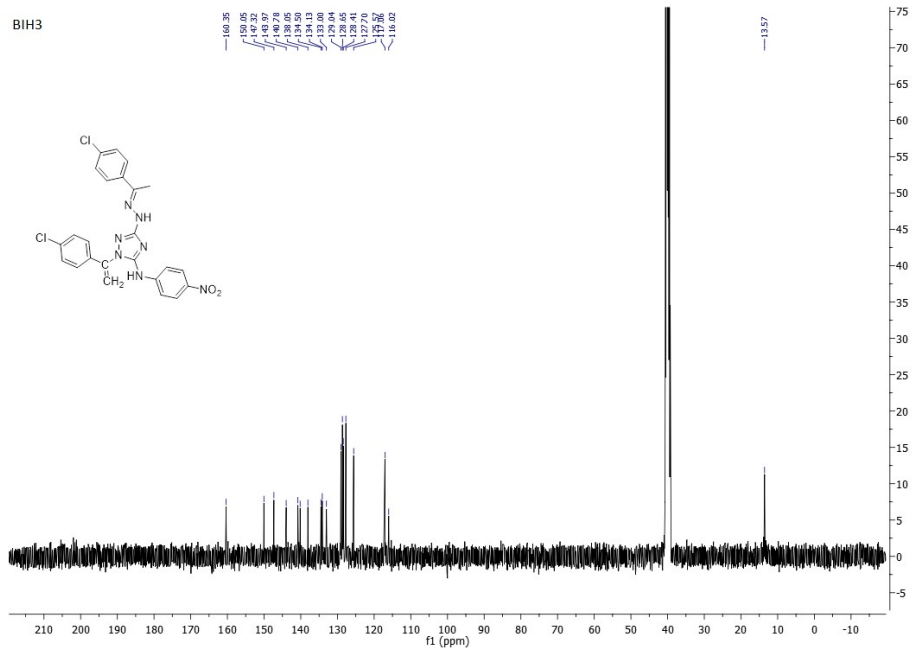

Figure 34. <sup>13</sup>C-NMR spectrum of compound BIH3

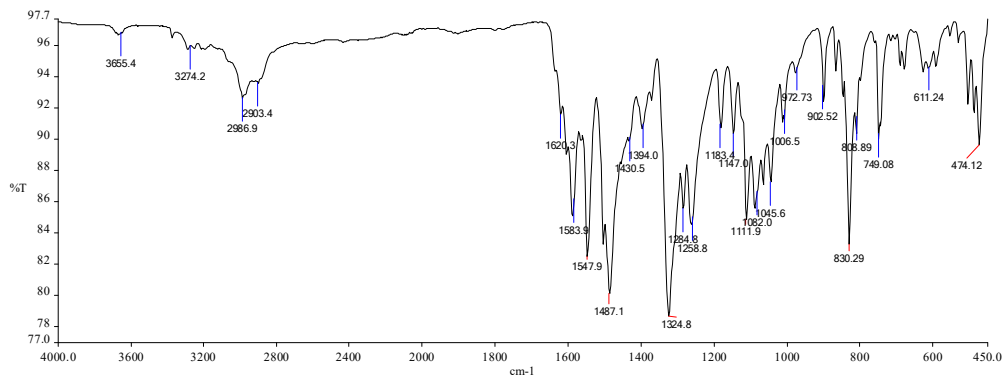

**Figure 35.** IR spectrum of compound **BIH3**

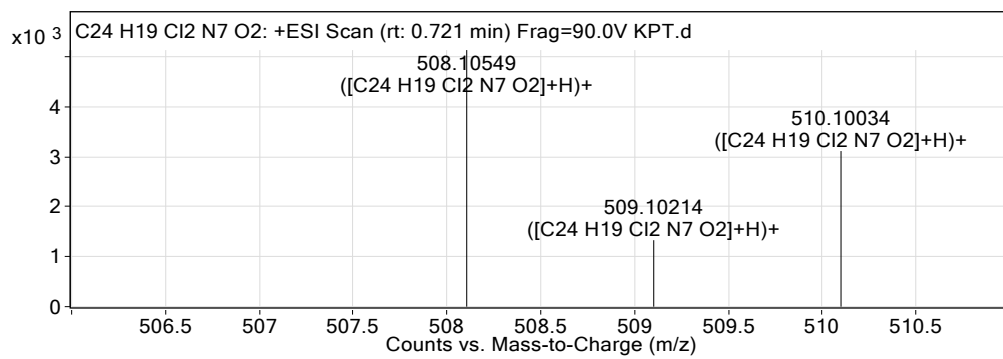

**Figure 36.** Mass spectrum of compound **BIH3**

# BIH4

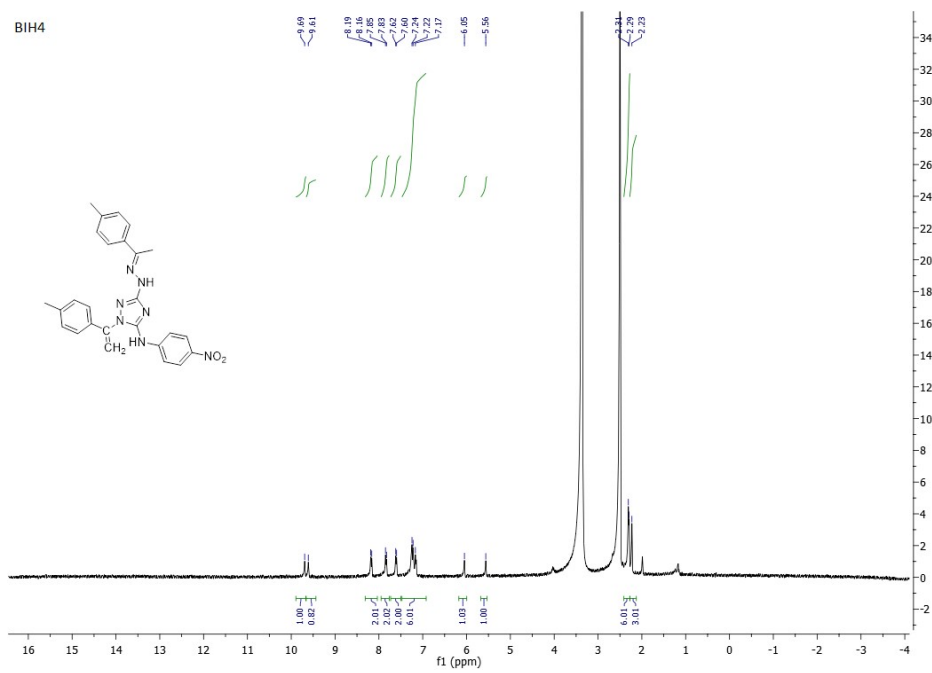

Figure 37.  $^1\text{H}$ -NMR spectrum of compound BIH4

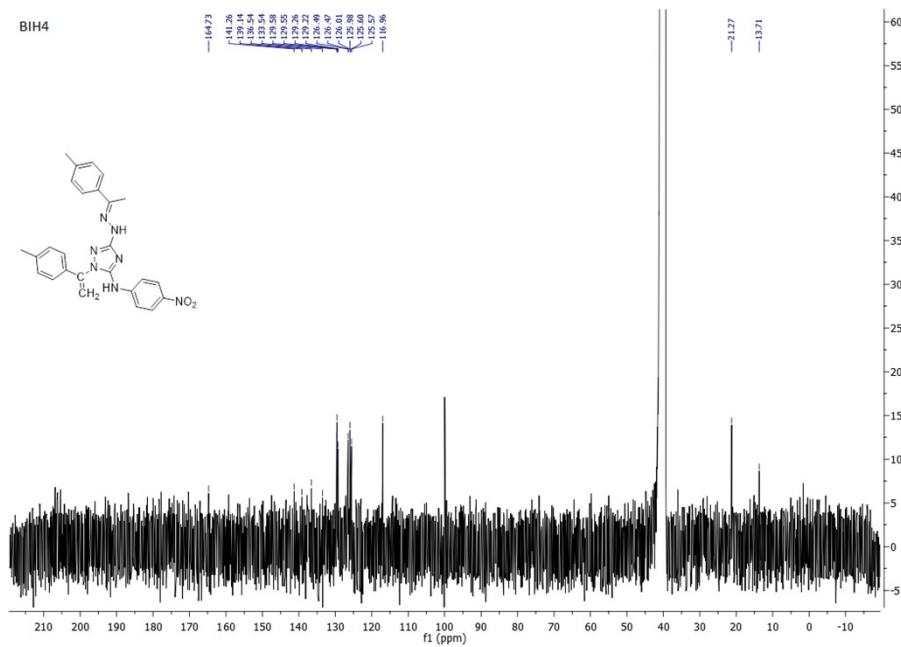

Figure 38.  $^{13}\text{C}$ -NMR spectrum of compound BIH4

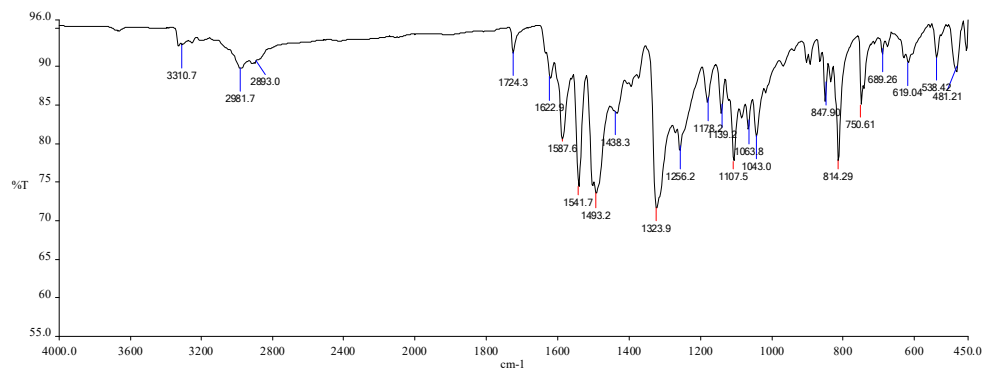

**Figure 39.** IR spectrum of compound **BIH4**

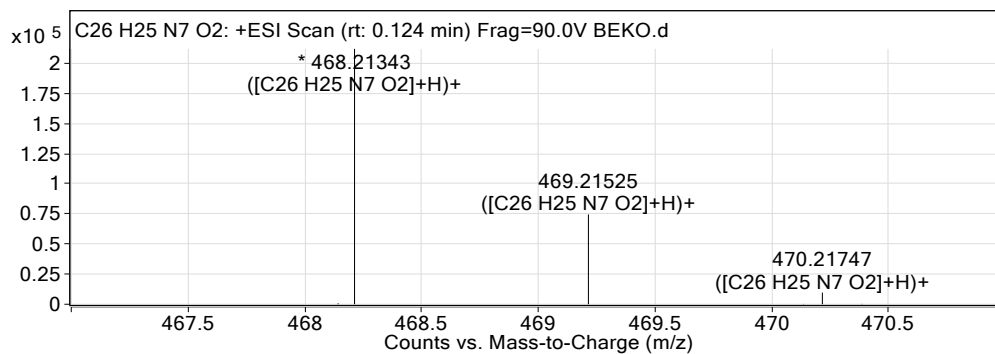

**Figure 40.** Mass spectrum of compound **BIH4**



# BIH5

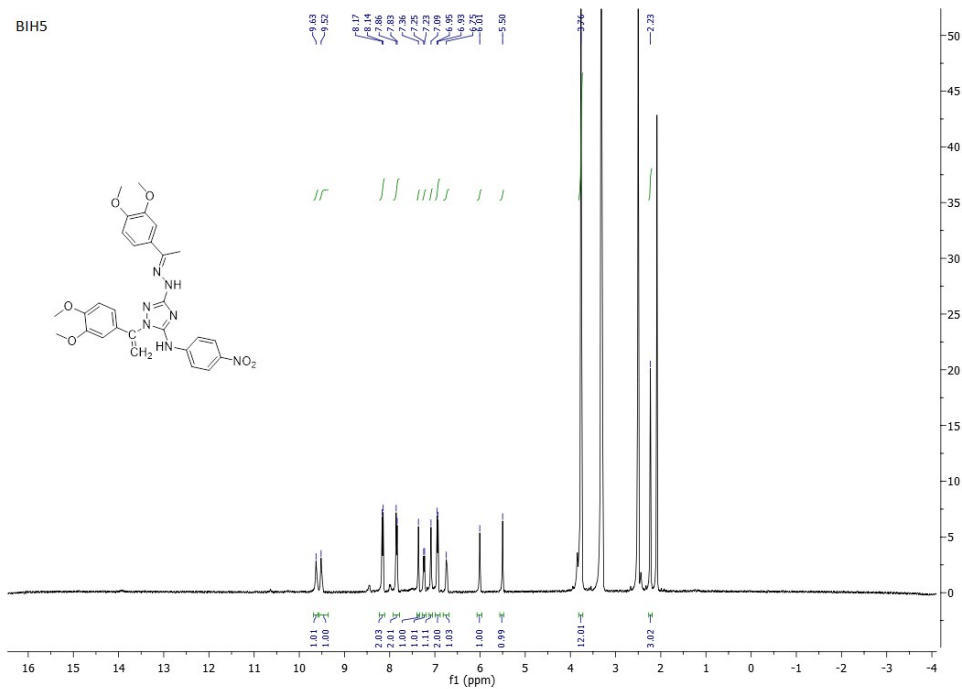

Figure 41.  $^1\text{H}$ -NMR spectrum of compound BIH5

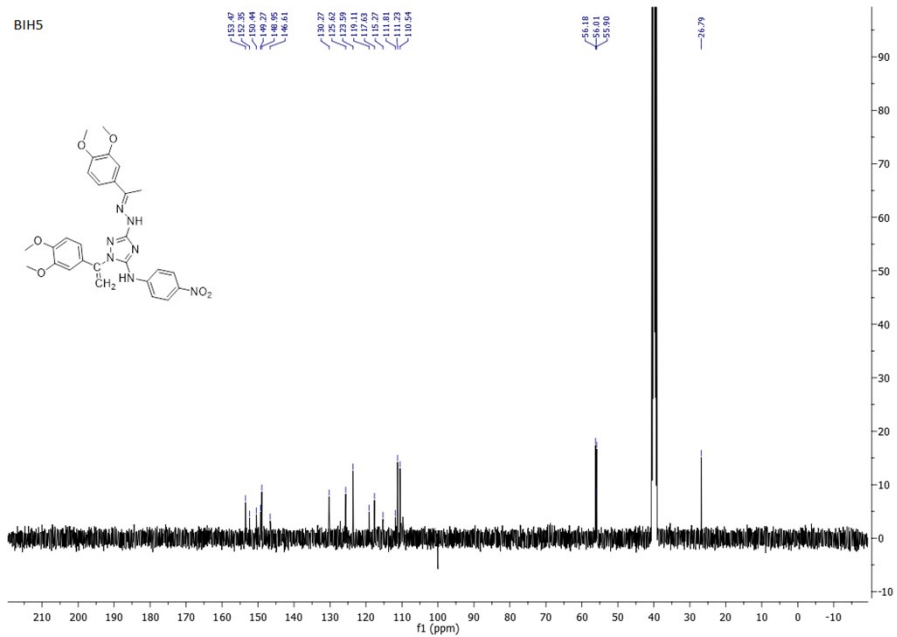

Figure 42.  $^{13}\text{C}$ -NMR spectrum of compound BIH5

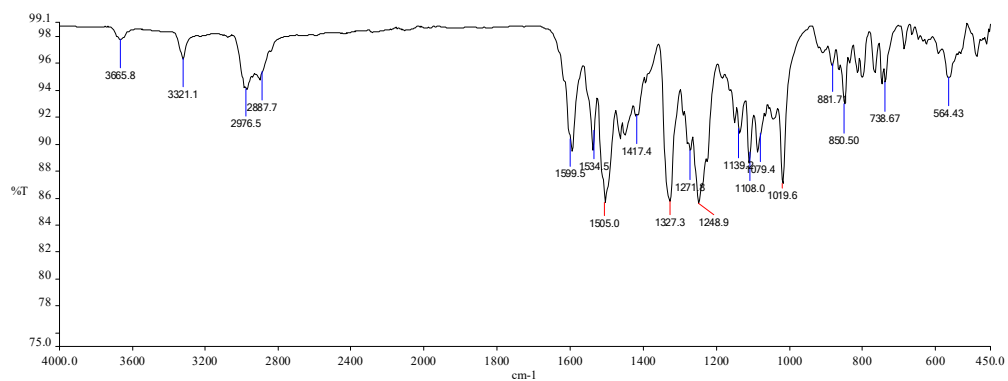

**Figure 43.** IR spectrum of compound **BIH5**

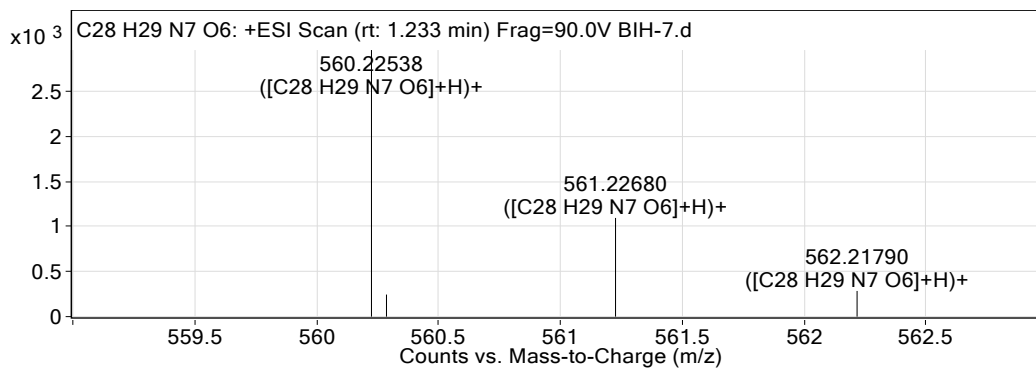

**Figure 44.** Mass spectrum of compound **BIH5**

# BIH6

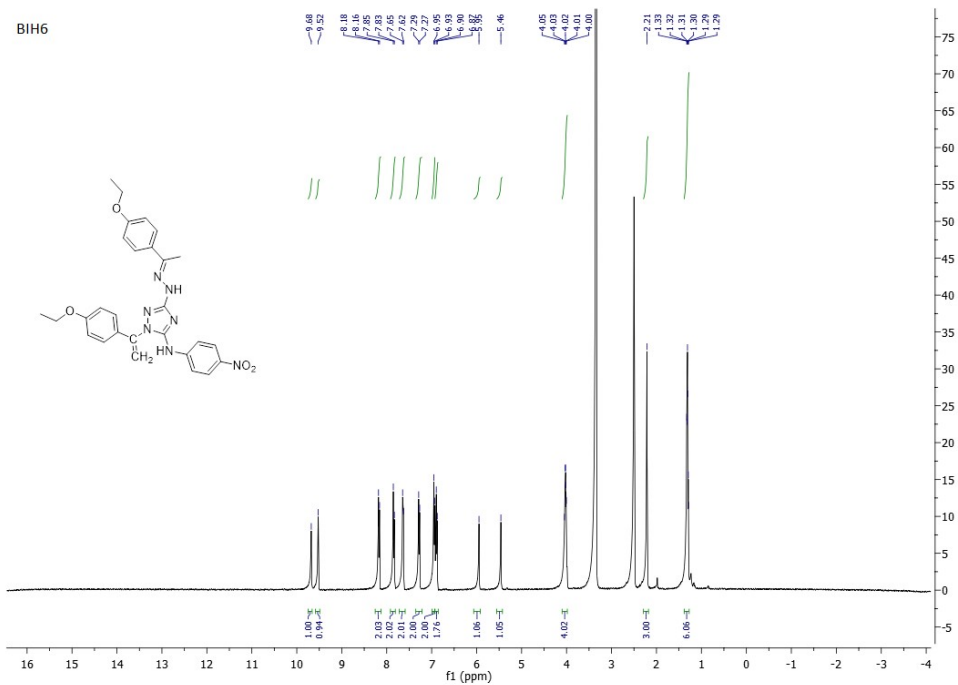

Figure 45. <sup>1</sup>H-NMR spectrum of compound BIH6

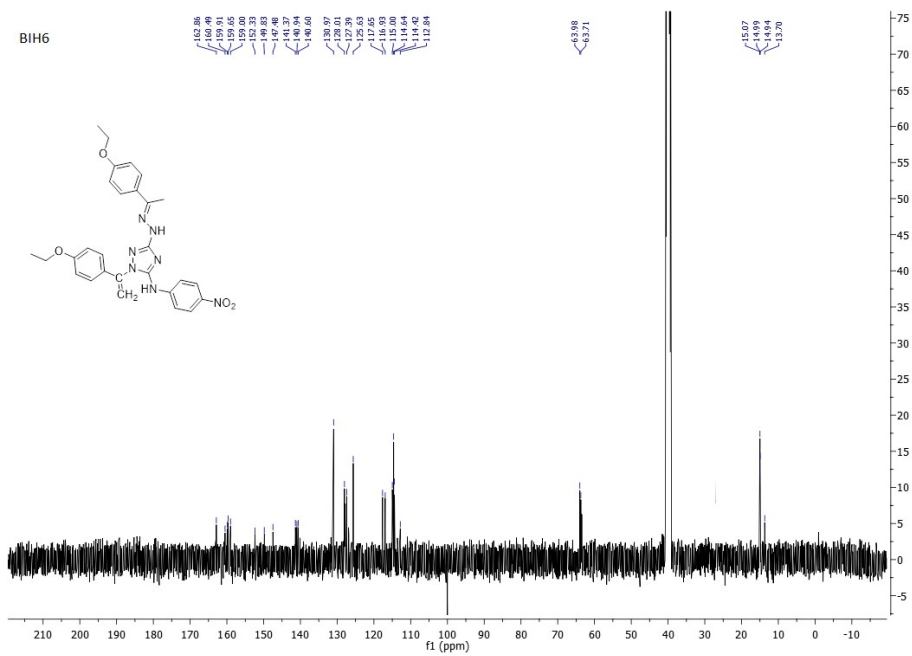

Figure 46. <sup>13</sup>C-NMR spectrum of compound BIH6

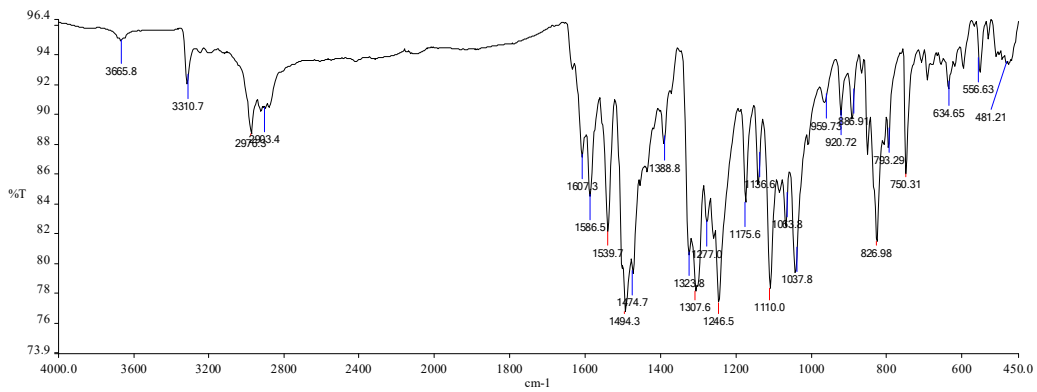

**Figure 47.** IR spectrum of compound **BIH6**

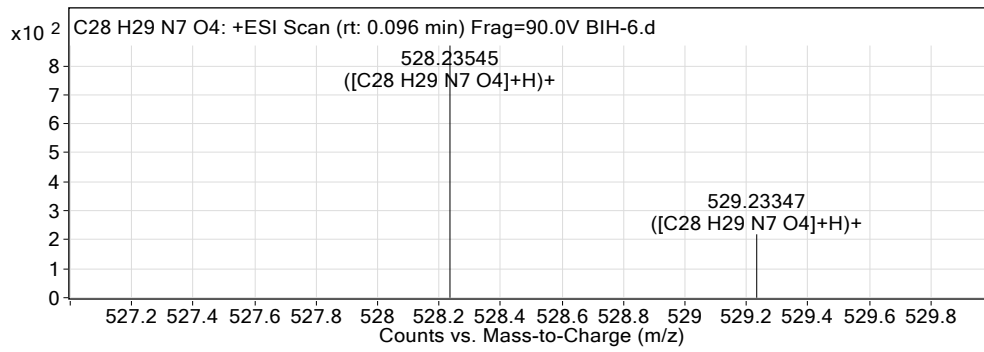

**Figure 48.** Mass spectrum of compound **BIH6**
